# Supplementary material for: Biodegradation of Petroleum Hydrocarbons by Drechslera spicifera Isolated from Contaminated Soil in Riyadh, Saudi Arabia
Source: MDPI journal article supplement (doi:10.3390/molecules27196450), 2022-09-30
Supplement: s1 [file s1]

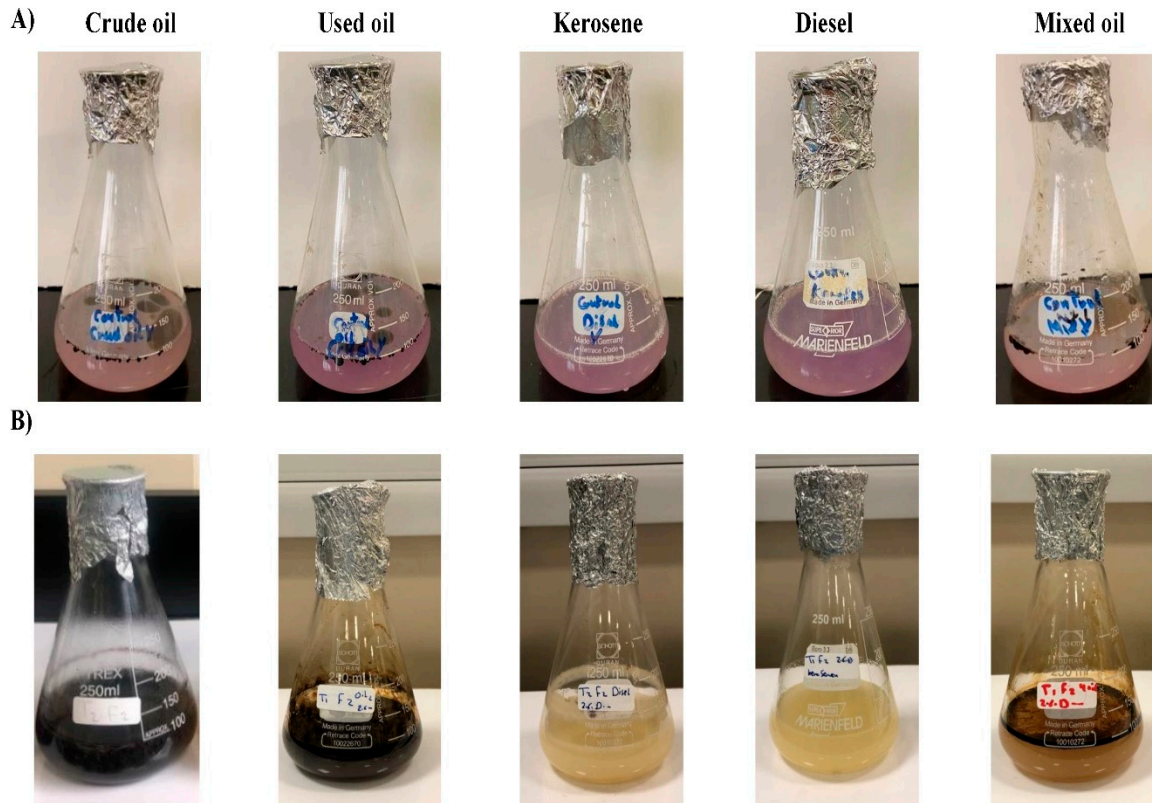

Supplementary Figure S1: DCPIP assay of *D. spicifera* on liquid media (MSM) containing 1% of different hydrocarbons. Liquid media (MSM) containing 1% of various oil sources; 0.1% (v/v) of Tween 80, and 0.6 mg/mL of redox indicator (DCPIP). A) DCPIP with different oil sources, without *D. spicifera*, as a control, B) DCPIP with different oil sources and *D. spicifera*.

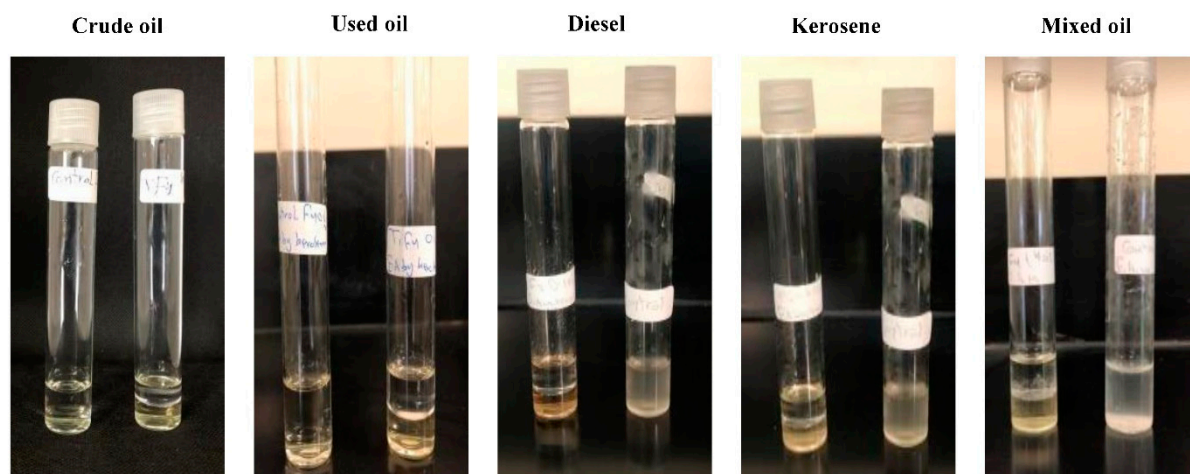

Supplementary Figure S2: Emulsification test of different hydrocarbons. The emulsification activity was measured to test the supernatant (CFS) containing biosurfactants from *D. spicifera*.
